# Supplementary material
Source: MDPI journal article supplement (https://www.mdpi.com/2673-706X/3/2/7)
Supplement: s1 [file s1]

Archive with 4 entries (4 files):
- Movie S1 23 LEDs lighting up by the HNG. (MP4).mp4
- Movie S2 Driving an electronic watch by the HNG on the linear motor experimental platform. (MP4).mp4
- Movie S3 Powering a temperature sensor by the wearable HNG. (MP4).mp4
- nanoenergyadv-2294762-supplementary.pdf
