# Supplementary material
Source: MDPI journal article supplement (https://www.mdpi.com/2673-706X/3/2/7)
Supplement: s1 [file s1 › nanoenergyadv-2294762-supplementary.pdf]

Supplementary

# A Hybrid Triboelectric-Electromagnetic Nanogenerator Based on Arm Swing Energy Harvesting

Jiayue Zheng <sup>1,2</sup>, Zhi Cao <sup>1,3</sup>, Chengcheng Han <sup>1,4</sup>, Xuelian Wei <sup>1,4</sup>, Linlin Wang <sup>2</sup> and Zhiyi Wu <sup>1,2,4,\*</sup>

<sup>1</sup> Beijing Institute of Nanoenergy and Nanosystems, Chinese Academy of Sciences, Beijing 101400, China

<sup>2</sup> College of Engineering, Zhejiang Normal University, Jinhua 321004, China

<sup>3</sup> School of Physical Science and Technology, Guangxi University, Nanning 530004, China

<sup>4</sup> School of Nanoscience and Technology, University of Chinese Academy of Sciences, Beijing 100049, China

\* Correspondence: wuzhiyi@binn.cas.cn

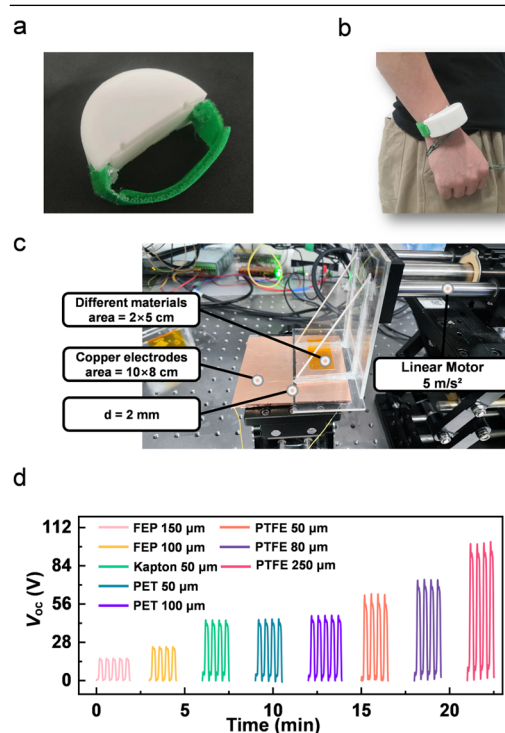

**Figure S1.** (a) The actual drawing of HNG. (b) The physical picture of HNG is worn on the hand. (c) Schematic diagram of the platform setup for testing performance output of different materials. (d) The output voltage of the TENG with different triboelectric materials.

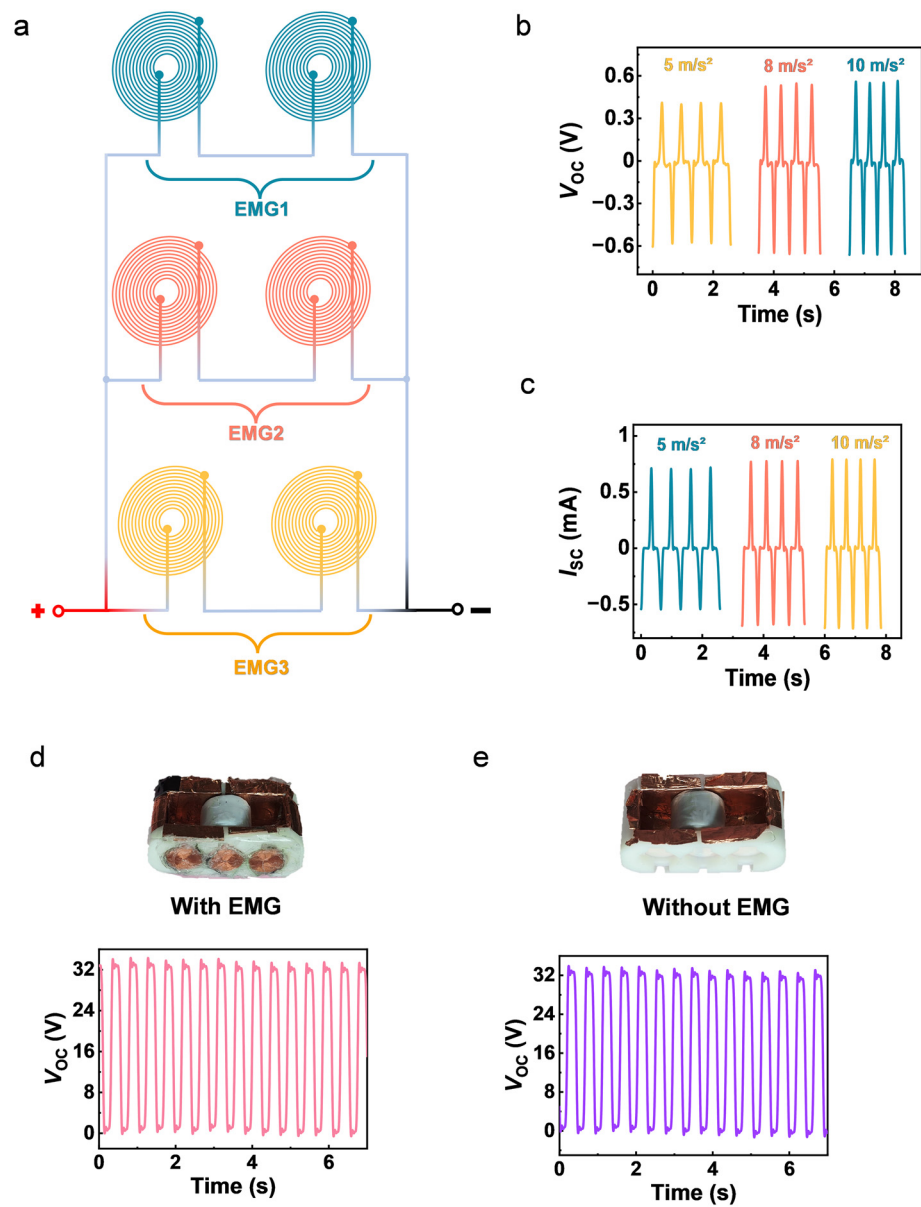

**Figure S2.** (a) Connection in parallel of EMGs. (b) The  $V_{oc}$  of EMGs in parallel at accelerations of 5  $m/s^2$ , 8  $m/s^2$ , 10  $m/s^2$ . (c) The  $I_{sc}$  of EMGs in parallel at accelerations of 5  $m/s^2$ , 8  $m/s^2$ , 10  $m/s^2$ . (d) The voltage output of TENG with EMG. (e) The voltage output of TENG without EMG.

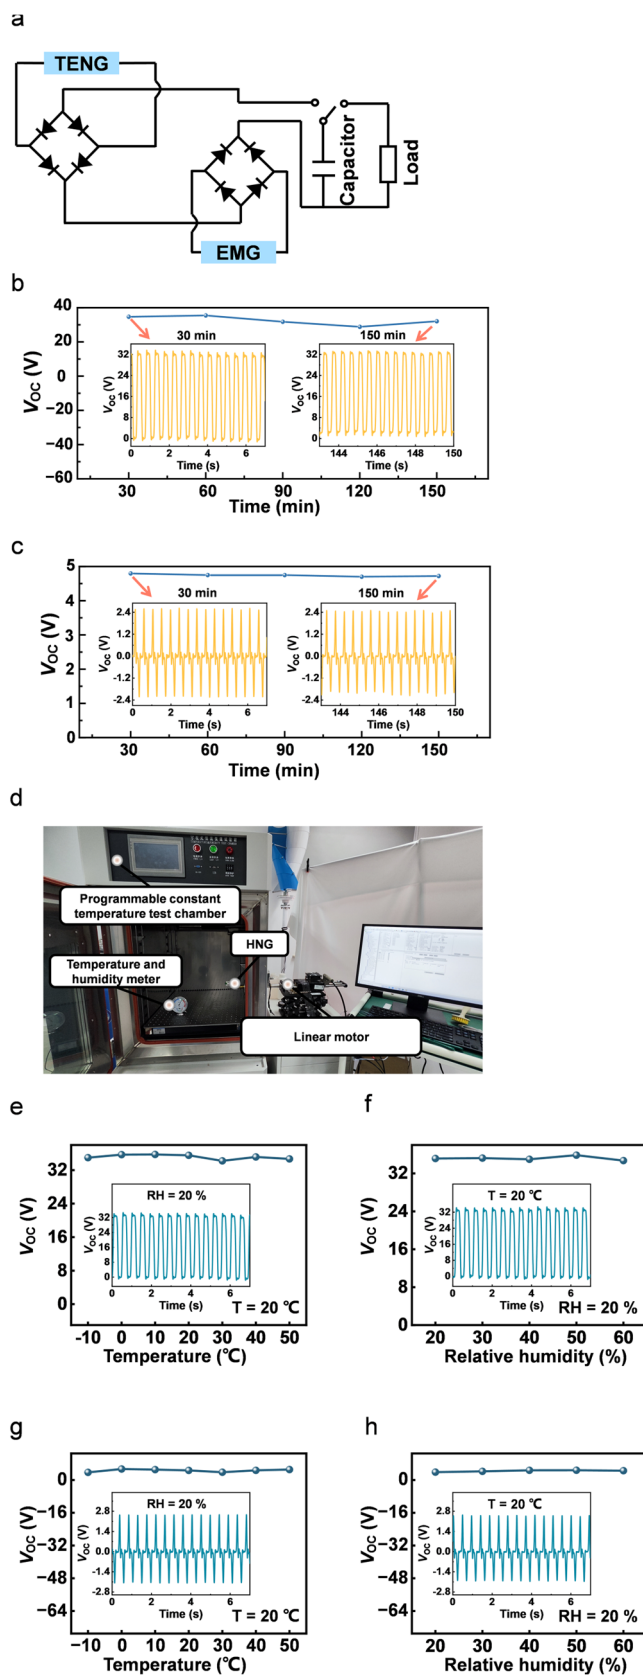

**Figure S3.** (a) Schematic diagram of the rectifier circuit of TENG and EMGs in series connection. (b) Stability and durability testing of TENG. (c) Stability and durability testing of EMG. (d) Display of temperature and humidity testing platform. The open-circuit voltage of the TENG is influenced by (e) relative humidity and (f) temperature. The open-circuit voltage of the EMG is influenced by (g) relative humidity and (h) temperature.

**Table S1.** The main performance parameters and advantages of the proposed nanogenerator with respect to other hybrid nanogenerators.

| Title                                                                                                                                        | Occupied Volume (mm <sup>3</sup> ) | Voltage Ratio per Unit Volume of the TENG (V/mm <sup>3</sup> ) | Current Ratio per Unit Volume of the EMG (mA/mm <sup>3</sup> ) | Maximum Frequency (Hz) | Energy Sources       |
|----------------------------------------------------------------------------------------------------------------------------------------------|------------------------------------|----------------------------------------------------------------|----------------------------------------------------------------|------------------------|----------------------|
| Self-powered sensing for smart agriculture by electromagnetic-triboelectric hybrid generator [35]                                            | ≈18,522,000                        | ≈0.702 × 10 <sup>-6</sup>                                      | ≈0.626 × 10 <sup>-6</sup>                                      | 62.1                   | Wind energy          |
| Rotating-disk-based hybridized electromagnetic-triboelectric nanogenerator for scavenging biomechanical energy as a mobile power source [36] | ≈183,000                           | ≈0.4098 × 10 <sup>-3</sup>                                     | ≈0.315 × 10 <sup>-3</sup>                                      | 600                    | Biomechanical energy |
| Hybrid energy cell for harvesting mechanical energy from one motion using two approaches [37]                                                | ≈405,000                           | ≈0.148 × 10 <sup>-2</sup>                                      | ≈0.2469 × 10 <sup>-5</sup>                                     | 22                     | Mechanical energy    |
| This work                                                                                                                                    | ≈35,342                            | ≈0.105 × 10 <sup>-2</sup>                                      | ≈0.143 × 10 <sup>-4</sup>                                      | 2.17                   | Biomechanical energy |

**Table S2.** Coil parameters

| Parameter           | Value        |
|---------------------|--------------|
| Coil-wire diameter  | 0.04 mm      |
| Length of each coil | 29,000 mm    |
| Each coil turns     | 6100 circles |

#### Note S1

##### The FEM model using COMSOL.

In a triboelectric nanogenerator (TENG), the initial boundary conditions used to generate the figures in the article for the two-dimensional electrostatic physics simulation performed using COMSOL were as follows: a surface charge density of  $q_1 = -9 \times 10^{-12}$  was applied to the edge of a circular magnet with radius  $R$ , and a surface charge density of  $q_2$  was applied to the two copper electrodes with side lengths of  $L + \pi \times R$ . The total charge on the circular edge was set to be equal to the sum of the charges on the two copper edges, with  $q_2 = -q_1 \times R \times \pi / (L + R \times \pi) = 4.174 \times 10^{-12}$ . In addition to the model being plotted, a large rectangle was also plotted to represent the air domain, with all four sides grounded and set as the reference potential zero point.

#### Note S2

Convert the parameter settings of the linear motor into frequency using formulas (1), (2), (3).

$$t_a = \frac{v_{max}}{a} \quad (1)$$

$$d_a = \frac{1}{2} a t_a^2 \quad (2)$$

$$f = \frac{v_{max}}{2d_a} \quad (3)$$

We can calculate that the corresponding frequencies for 5 m/s<sup>2</sup>, 8 m/s<sup>2</sup> and 10 m/s<sup>2</sup> are 1.04 Hz, 1.67 Hz and 2.17 Hz, respectively.
